# Supplementary material
Source: Royal Society of Chemistry journal article supplement (doi:10.1039/d5fo05678k)
Supplement: d5fo05678k1.pdf [file d5fo05678k1.pdf]

# 1. Screening of differential lipid metabolites in serum and pathway enrichment analysis

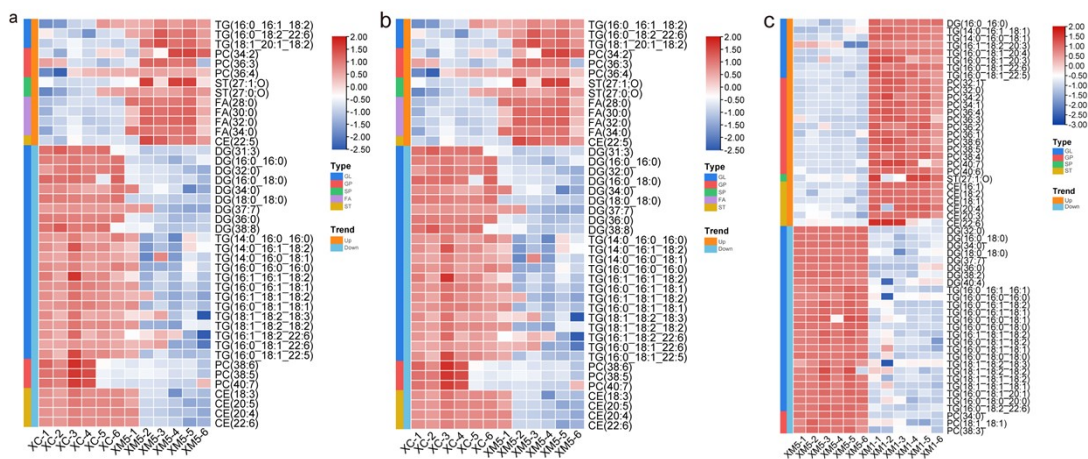

3 Fig. S1. (a) Differential lipid heatmap: control group vs XM5 group, (b) Differential  
4 lipid heatmap: control group vs XM1 group, (c) Differential lipid heatmap: XM5 group  
5 vs XM1 group. (n = 6 per group).

# 2. Screening of differential lipid metabolites in the brain and pathway enrichment analysis

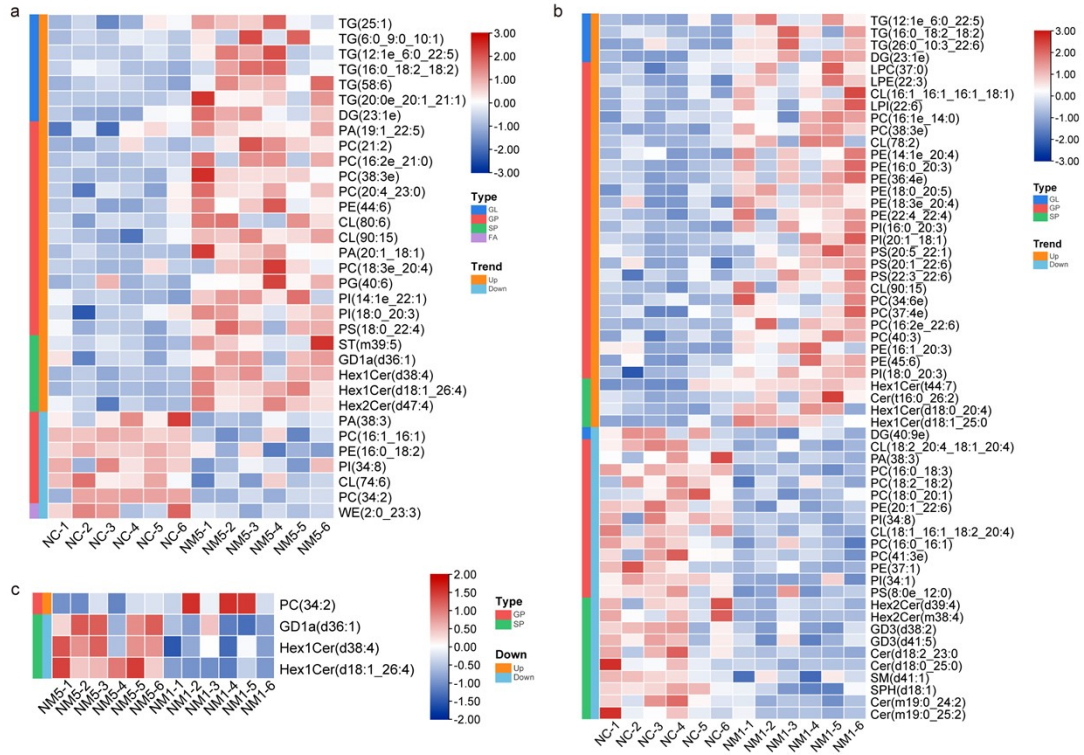

9

10 Fig.S2. (a) Differential lipid heatmap: control group vs NM5 group, (b) Differential  
 11 lipid heatmap: control group vs NM1 group, (c) Differential lipid heatmap: NM5 group  
 12 vs NM1 group. (n = 6 per group).
